# Supplementary material
Source: publisher site journal article supplement (https://www.spandidos-publications.com/5196/downloadSupplementary)

Figure S1. Box plot showing the significant difference in FDPS expression between tumor (red) and normal (black) samples from six cancer types in TCGA database. \*P<0.01. COAD, colon adenocarcinoma; DLBC, lymphoid neoplasm diffuse large B-cell lymphoma; KICH, kidney chromophobe; LAML, acute myeloid leukemia; LIHC, liver hepatocellular carcinoma; N, normal (tissues); PAAD, pancreatic adenocarcinoma; READ, rectum adenocarcinoma; THYM, thymoma; TPM, transcripts per million; T, tumor (tissues).

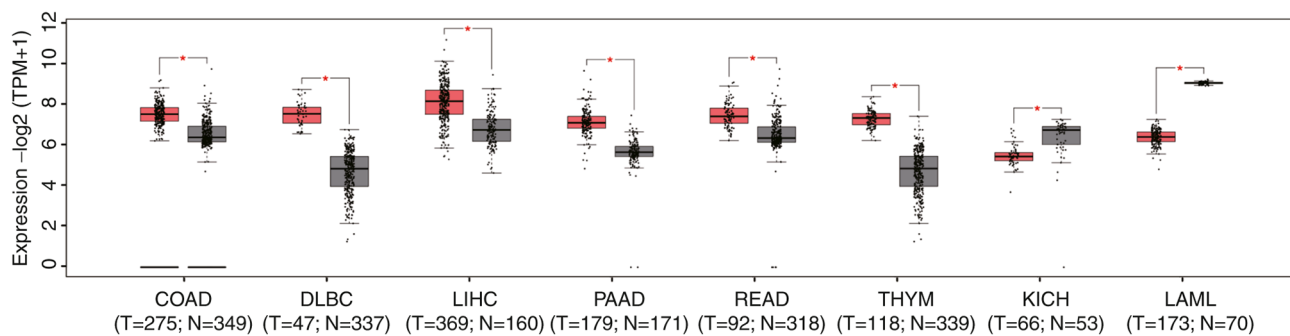

Supplement: Supplementary file 1 [file downloadSupplementary]
